# Supplementary material for: The preventive effect and underlying mechanism ofRhus chinensisMill. fruits on dextran sulphate sodium-induced ulcerative colitis in mice
Source: Royal Society of Chemistry journal article supplement (doi:10.1039/d1fo01558c), 2021-01-01

## SUPPORTING INFORMATION

### **Prevention and underlying mechanism of *Rhus chinensis* Mill. fruits on dextran sulphate sodium-induced ulcerative colitis in mice**

Yi Zhang<sup>1</sup>, Ou Wang<sup>2</sup>, Nan Ma<sup>1</sup>, Junjie Yi<sup>1</sup>, Hongying Mi<sup>3\*</sup>, Shengbao Cai<sup>1\*</sup>

<sup>1</sup>Faculty of Agriculture and Food, Yunnan Institute of Food Safety, Kunming University of Science and Technology, Kunming, Yunnan Province, People's Republic of China, 650500;

<sup>2</sup>National Institute for Nutrition and Health, Chinese Center for Disease Control and Prevention, Beijing, People's Republic of China, 100050;

<sup>3</sup>The First People's Hospital of Yunnan Province, Affiliated Hospital of Kunming University of Science and Technology, Kunming, Yunnan Province, People's Republic of China, 650032.

#### **\* Corresponding author and proofs**

Shengbao Cai

E-mail: caikmust2013@163.com

Hongying Mi

E-mail: hongyingmi6100@sina.com

Fig. S1 The chromatograms of ethanol extract of *Rhus chinensis* Mill. fruits.

Peaks identification and their MS data are shown in Table S1. The base peak

chromatogram is shown in Fig. A and the extracted ion chromatogram is shown

in Fig. B-G.

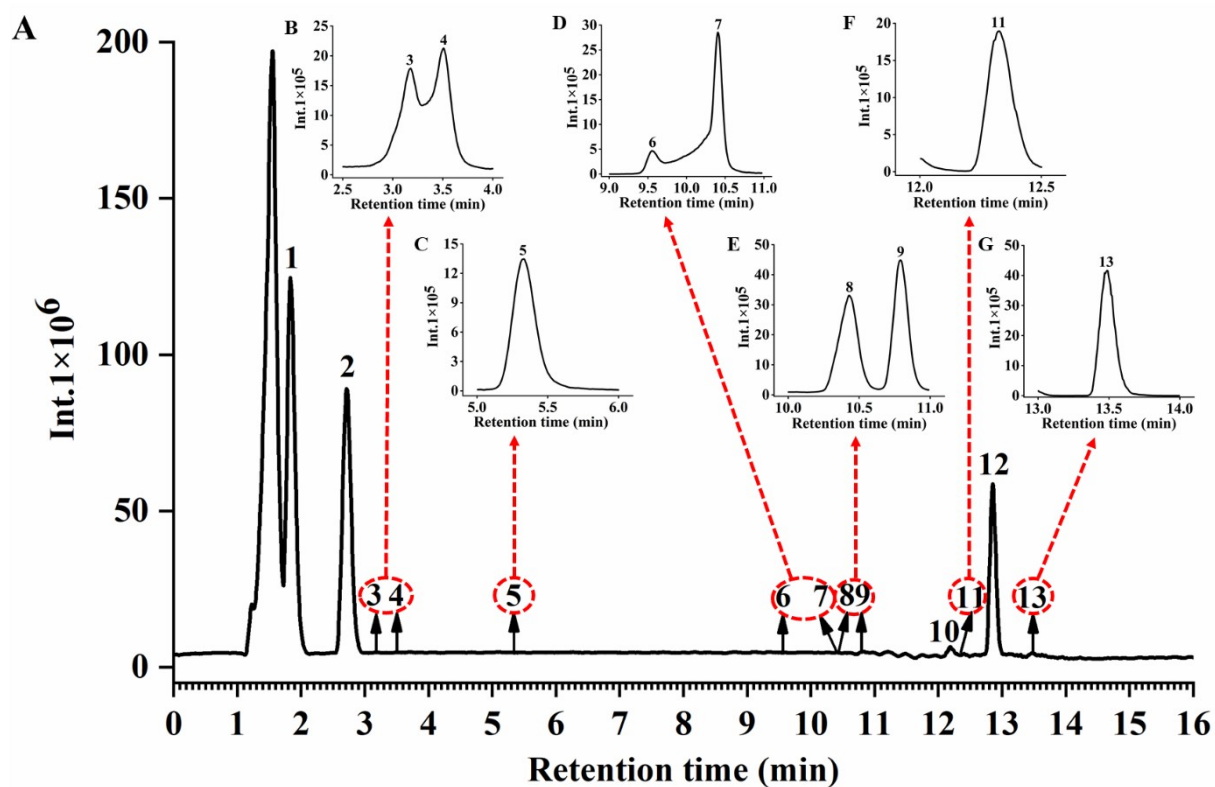

**Table S1** Phenolic compounds identified in *Rhus chinensis* Mill. fruits by UHPLC-ESI-HRMS/MS in negative mode.

| Peak No. | Compounds                          | Molecular formula                               | Retention time (min) | [M-H] <sup>-</sup> ( <i>m/z</i> ) | MS/MS ion fragments                             |
|----------|------------------------------------|-------------------------------------------------|----------------------|-----------------------------------|-------------------------------------------------|
| 1        | Citric acid                        | C <sub>6</sub> H <sub>8</sub> O <sub>7</sub>    | 1.83                 | 191.0188                          | 57.0332(64.43), 87.0074(100), 111.0075(49.46)   |
| 2        | Gallic acid                        | C <sub>7</sub> H <sub>6</sub> O <sub>5</sub>    | 2.72                 | 169.0132                          | 69.0331(100), 97.0281(37.62), 125.0230(32.21)   |
| 3        | Di- <i>O</i> -galloyl-glucoside I  | C <sub>20</sub> H <sub>20</sub> O <sub>14</sub> | 3.18                 | 483.0780                          | 125.0231(25.56), 169.0132(100), 331.0675(4.53)  |
| 4        | Di- <i>O</i> -galloyl-glucoside II | C <sub>20</sub> H <sub>20</sub> O <sub>14</sub> | 3.51                 | 483.0780                          | 125.0231(22.51), 169.0132(100), 331.0674(5.52)  |
| 5        | Protocatechuic acid                | C <sub>7</sub> H <sub>6</sub> O <sub>4</sub>    | 5.33                 | 153.0182                          | 108.0203 (100), 109.0286 (40.74)                |
| 6        | Digallic acid I                    | C <sub>14</sub> H <sub>9</sub> O <sub>9</sub>   | 9.55                 | 321.0250                          | 125.0231 (100), 169.0132(30.57)                 |
| 7        | Digallic acid II                   | C <sub>14</sub> H <sub>10</sub> O <sub>9</sub>  | 10.40                | 321.0251                          | 125.0231 (100), 169.0132 (29.67)                |
| 8        | Trigalloylglucose I                | C <sub>27</sub> H <sub>24</sub> O <sub>18</sub> | 10.43                | 635.0894                          | 169.0132(100), 483.0777(29.91), 635.0892(5.90)  |
| 9        | Trigalloylglucose II               | C <sub>27</sub> H <sub>24</sub> O <sub>18</sub> | 10.79                | 635.0894                          | 169.0132(100), 483.0772(22.61), 635.0893(13.11) |
| 10       | Myricetin-3- <i>O</i> -rhamnoside  | C <sub>21</sub> H <sub>20</sub> O <sub>12</sub> | 12.19                | 463.0881                          | 271.0245(28.19), 300.0273(100), 316.0221(40.44) |
| 11       | Luteolin-7- <i>O</i> -glucoside    | C <sub>21</sub> H <sub>20</sub> O <sub>11</sub> | 12.33                | 447.0931                          | 284.0325(51.13), 285.0402(100)                  |
| 12       | Quercetin-3- <i>O</i> -rhamnoside  | C <sub>21</sub> H <sub>20</sub> O <sub>11</sub> | 12.85                | 447.0930                          | 300.0274(100),301.0341(53.33)                   |
| 13       | Kaempferol-3- <i>O</i> -hexoside   | C <sub>21</sub> H <sub>20</sub> O <sub>10</sub> | 13.49                | 431.0983                          | 255.0295(79.61), 284.0325(100),285.0398 (86.51) |

Raw images of western blot in Figure 6

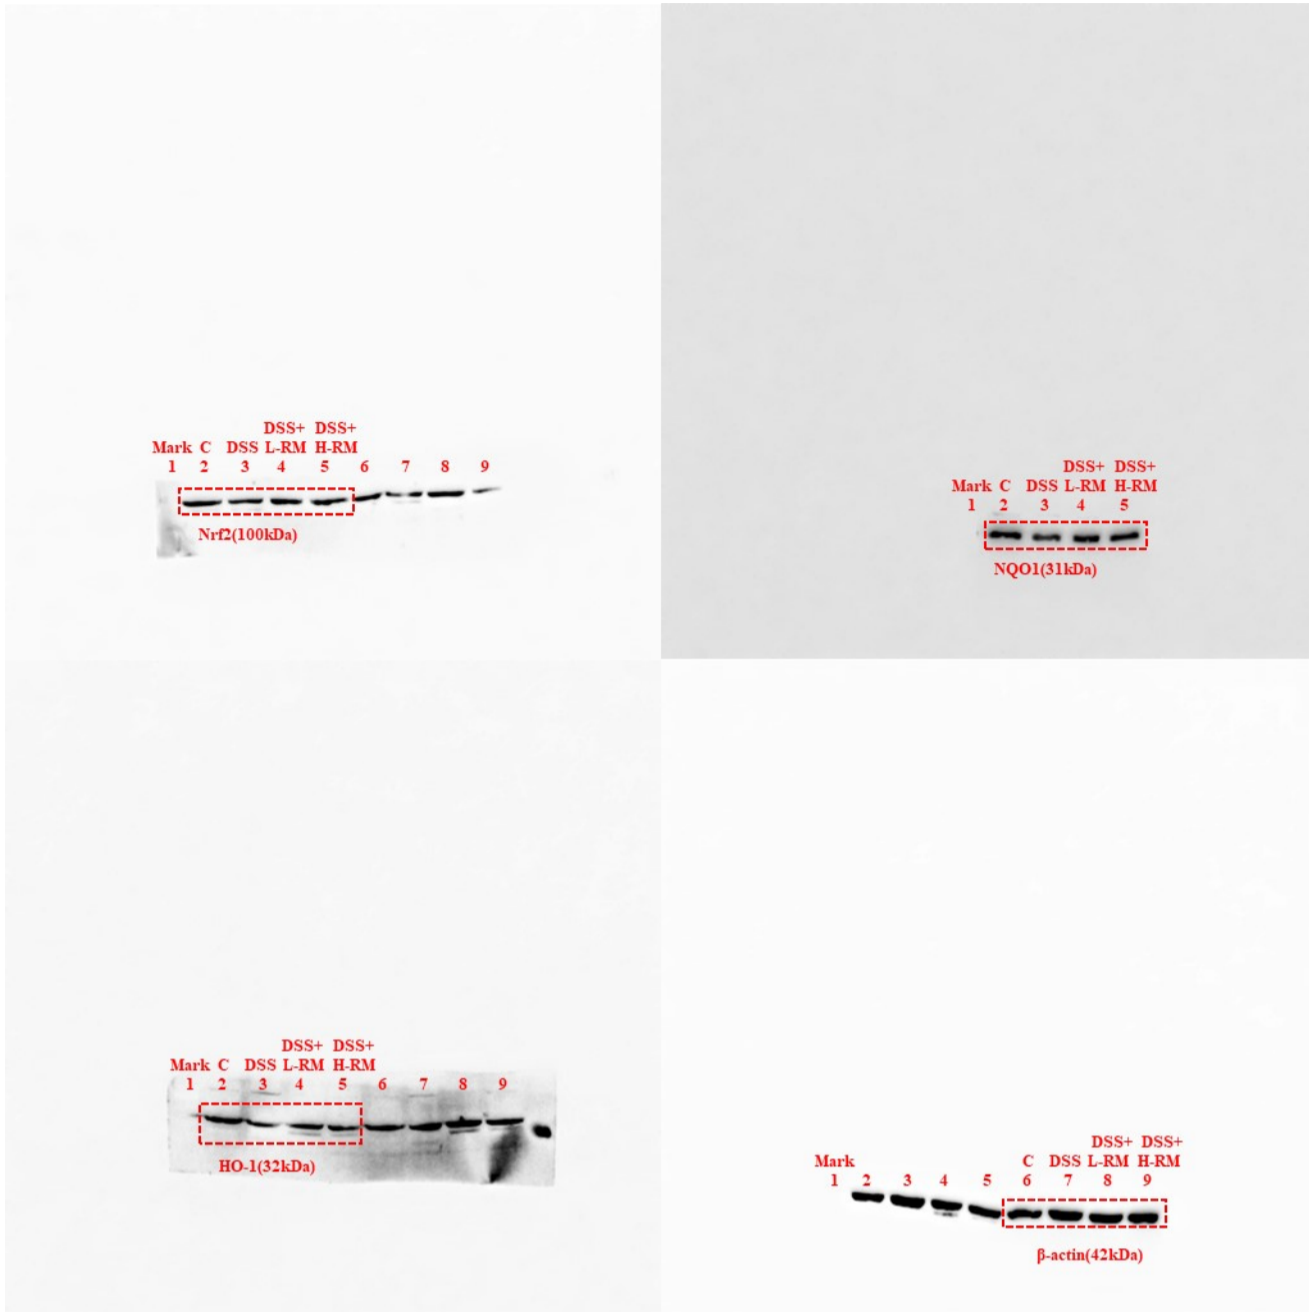

Raw images of western blot in Figure 7

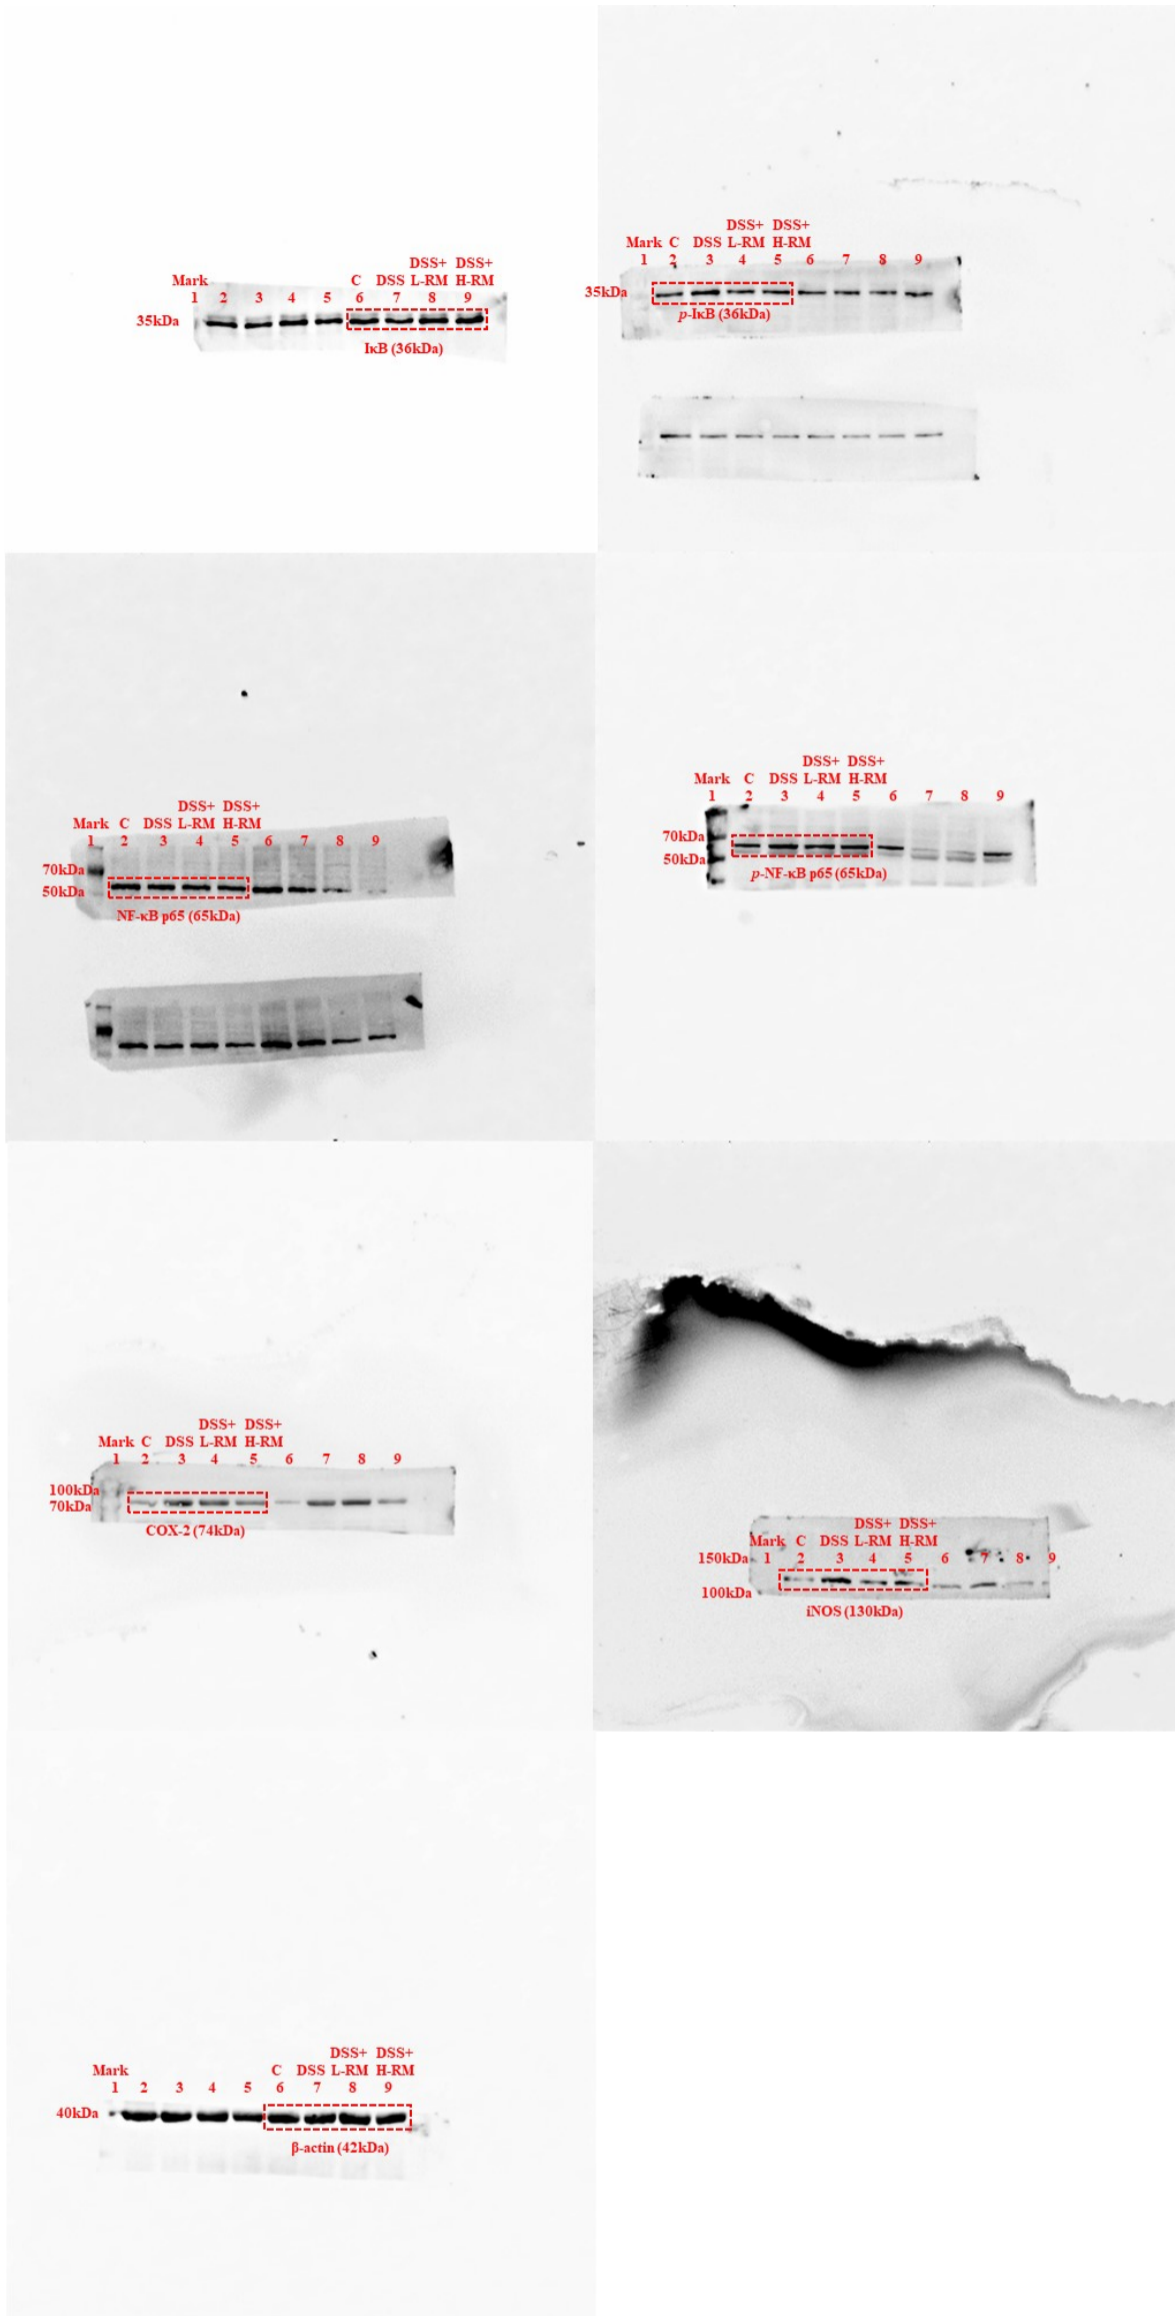

Raw images of western blot in Figure 8

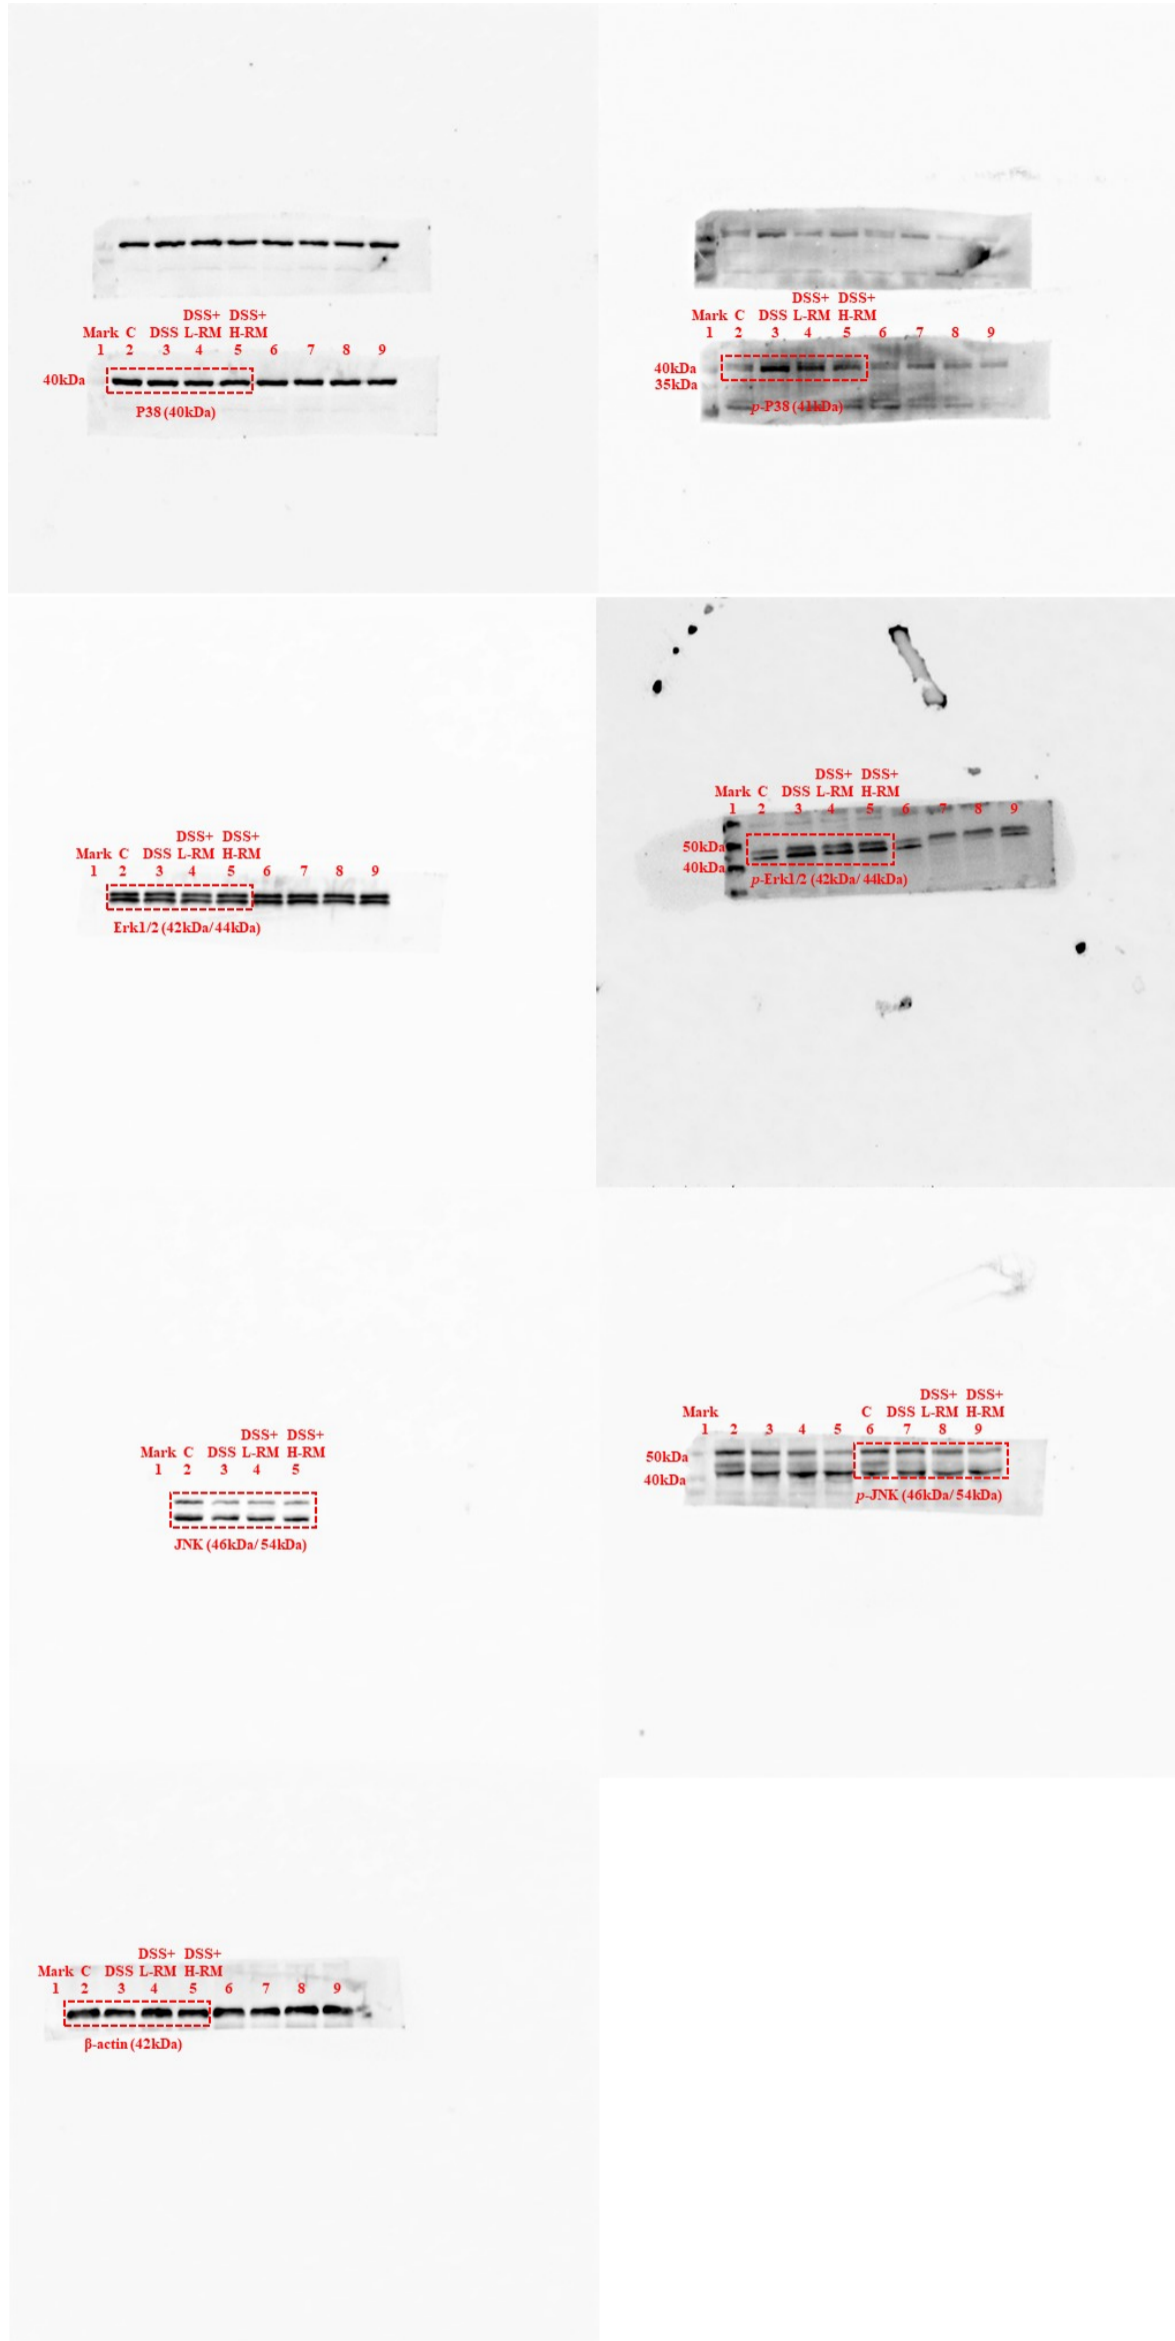

Supplement: d1fo01558c1.pdf [file d1fo01558c1.pdf]
